# Supplementary material for: ARRB1 Regulates Metabolic Reprogramming to Promote Glycolysis in Stem Cell-Like Bladder Cancer Cells
Source: MDPI journal article supplement (doi:10.3390/cancers13081809), 2021-04-10
Supplement: s1 [file s1]

# Supplementary Material: ARRB1 Regulates Metabolic Reprogramming to Promote Glycolysis in Stem Cell-Like Bladder Cancer Cells

Kenza Mamouni, Jeongheun Kim, Bal L. Lokeshwar and Georgios Kallifatidis

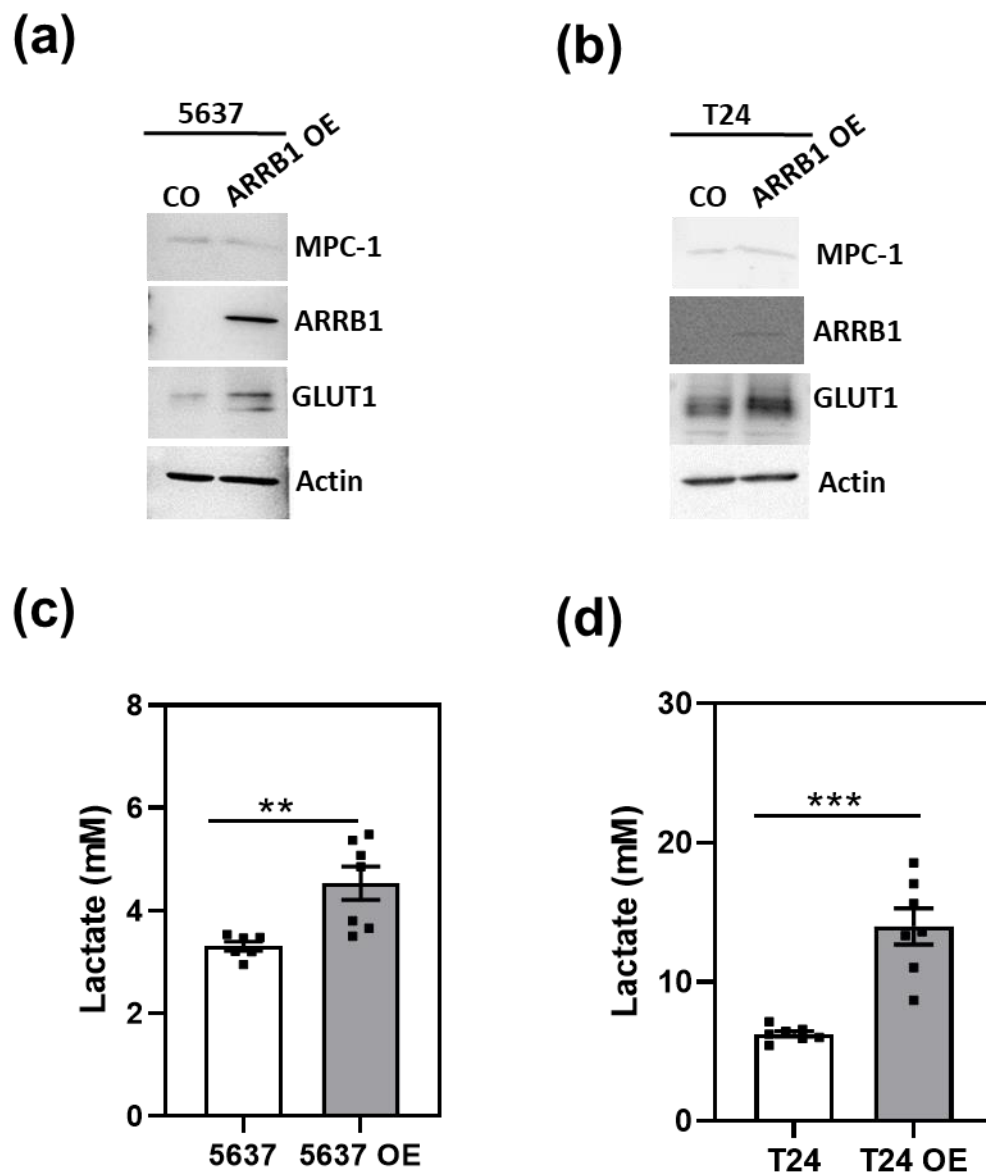

**Figure S1.** Over expression of ARRB1 in bladder cancer cell lines 5637 and T24 increases glycolysis: **(a, b)** Immunoblot for detection of MPC1 and GLUT1 in bladder cancer cell lines (5637 and T24) following over expression of ARRB1. **(c, d)** Quantification of glycolysis (lactate production) in ARRB1-overexpressing cells (5637 OE and T24 OE) and corresponding controls. Data: means  $\pm$  SEM, n=6 or 7; \*\*\* p<0.001, \*\* p<0.01 (two-tailed unpaired t test). The experiments were repeated once.

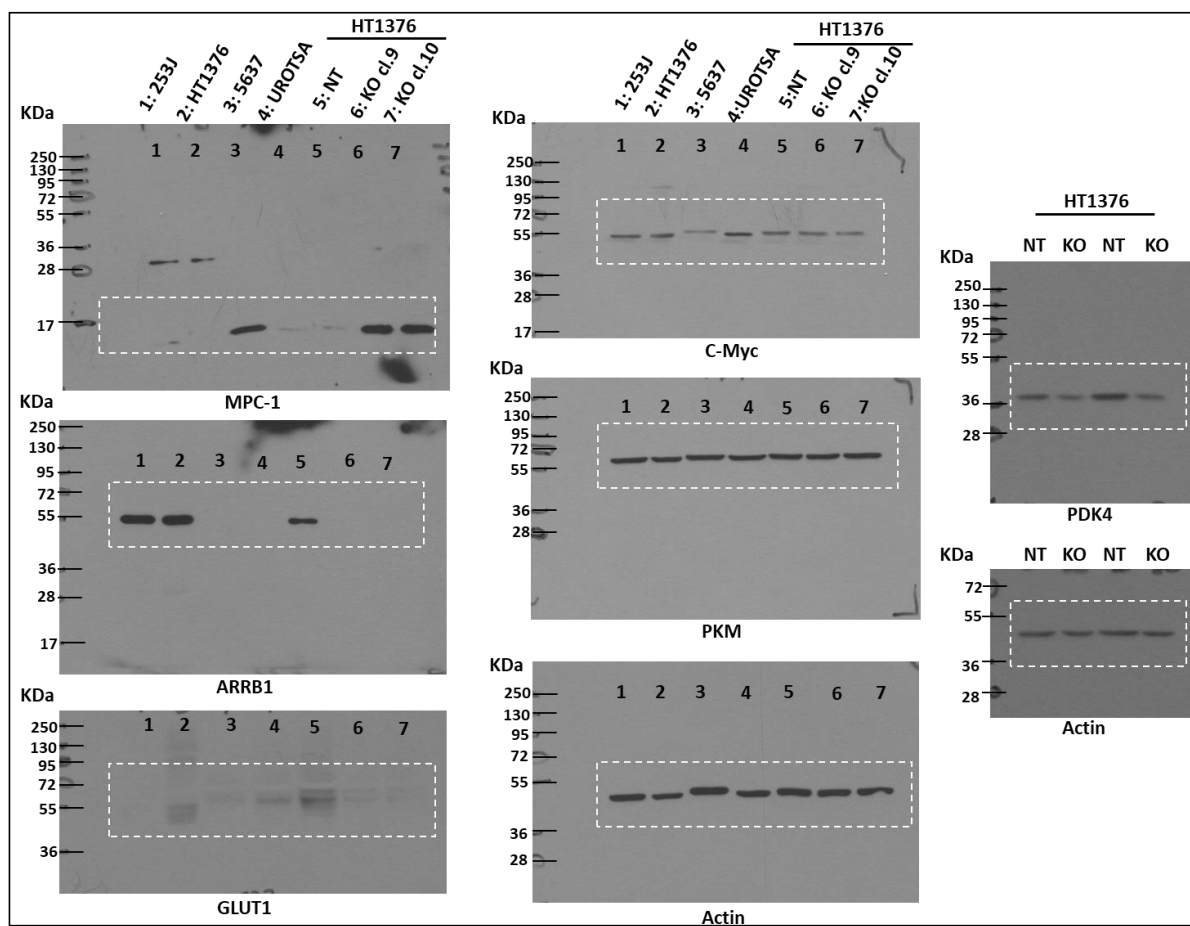

Figure S2. uncropped western blots from Figure 4.

# ARRB1 KO cl.9

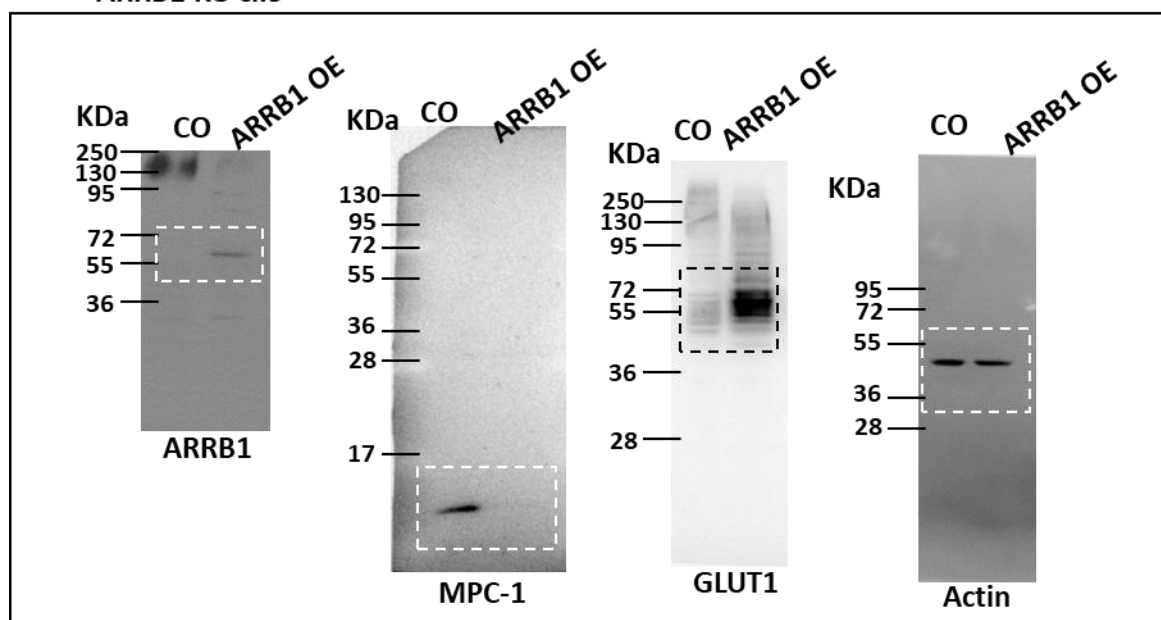

# ARRB1 KO cl.10

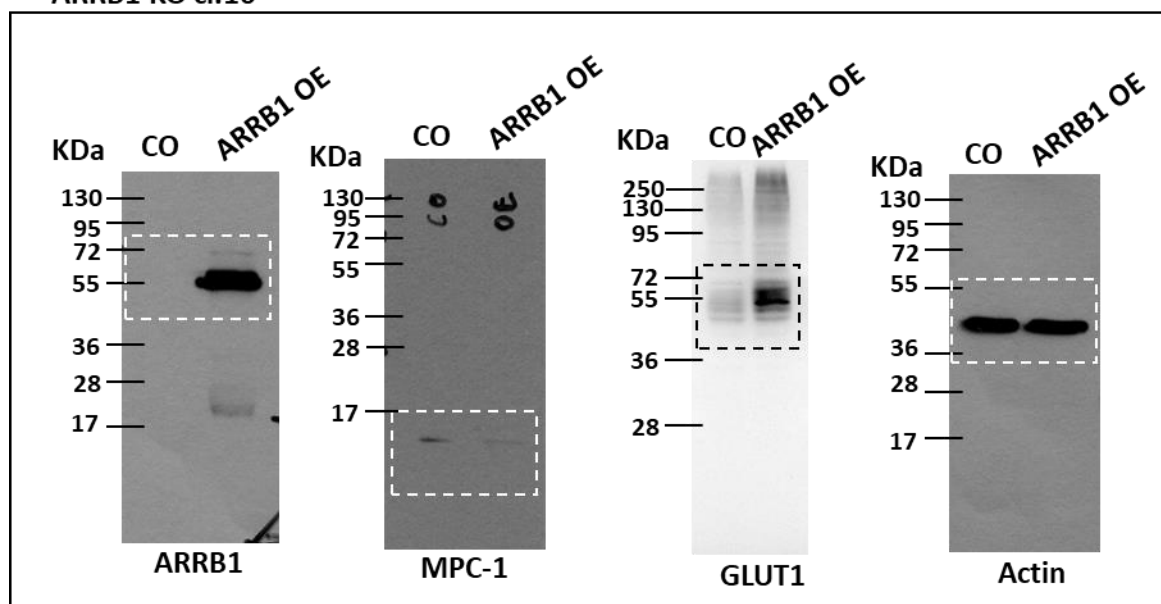

Figure S3: uncropped western blots from Figure 5

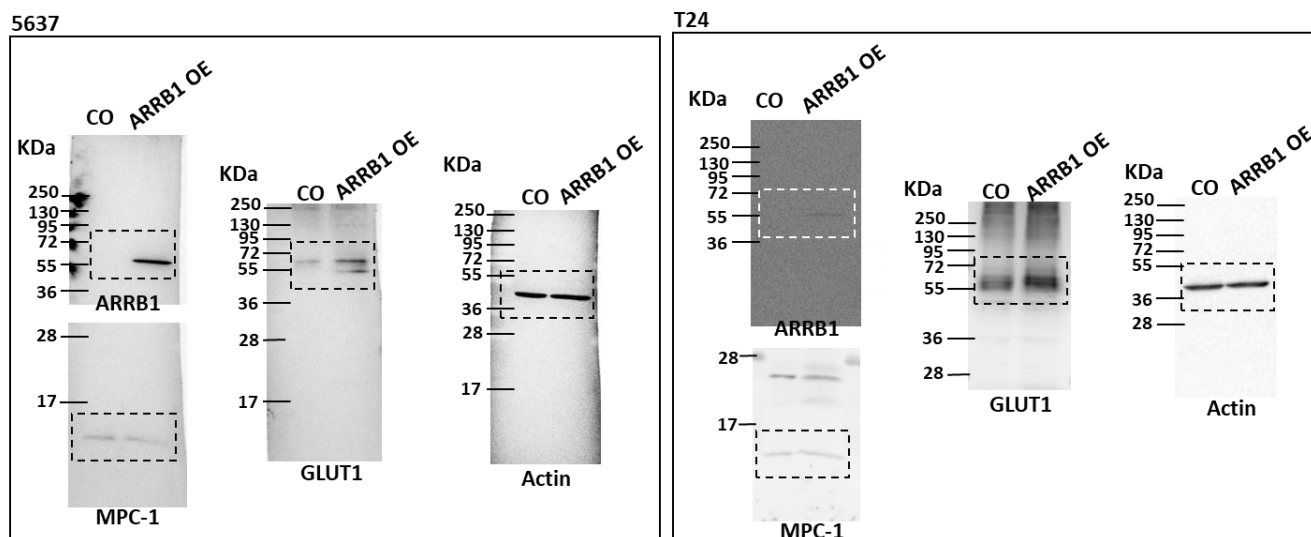

**Figure S4:** uncropped western blots from Supplementary Figure S1.

**Table S1:** Antibodies and dilutions

| Antibodies used in Western Blot analysis |              |                           |                |              |                        |
|------------------------------------------|--------------|---------------------------|----------------|--------------|------------------------|
| Target                                   | Host Species | Supplier                  | Catalog number | Dilution     | Blocker                |
| Actin (13E5)                             | rabbit       | Cell Signaling            | 5125s          | 1:100,000    | 5% NFDM                |
| ARRB1 (D803J)                            | rabbit       | Cell Signaling            | 12697s         | 1:1,000      | 5% NFDM                |
| c-Myc (Lot# 1151610301)                  | rabbit       | ABclonal                  | A1309          | 1:3,000      | 5% NFDM                |
| Glut 1 (D3J3A)                           | rabbit       | Cell Signaling            | 12939s         | 1,000-1:3000 | 5%BSA                  |
| MPC1 (D2L9I)                             | rabbit       | Cell Signaling            | 14462s         | 1:1,000      | 5% Milk                |
| PDK4 (Lo# 3301330101)                    | rabbit       | ABclonal                  | A3069          | 1:5,000      | 5% Milk                |
| PKM                                      | rabbit       | ABclonal                  | A0268          | 1:3,000      | 5% Milk                |
| Antibodies used in Immunofluorescence    |              |                           |                |              |                        |
| Target                                   | Host Species | Supplier                  | Catalog number | Dilution     | Blocker                |
| Bmi1 (D20B7) XP (R)                      | rabbit       | Cell Signaling            | 6964s          | 1:200        | 3% BSA, 10% goat serum |
| HCAM/CD44 (DF 1485)                      | mouse        | Santa Cruz Bio-technology | Sc-7297        | 1:50         | 3% BSA, 10% goat serum |
